# Supplementary material for: Intra-articular injection of bone marrow aspirate concentrate in end stage knee osteoarthritis: 4 year results of 37 knees
Source: Research Square preprint supplement (doi:10.21203/rs.3.rs-3391670/v1), 2023-10-28
Supplement: Supplementary file 6 [file bddb81e1b31afa757e460774.docx]

Harald: WOMAC: Vorher kein Geschlechtsunterschied, IKDC schon.

**T-Test: Vergleich Vorher vs. letzten Nachher-Zeitpunkt**

| **Statistik bei gepaarten Stichproben** | | | | | |
| --- | --- | --- | --- | --- | --- |
|  | | Mittelwert | N | Standardabweichung | Standardfehler des Mittelwertes |
| Paaren 1 | t0_WOMAC-SCORE | 39,73 | 37 | 22,773 | 3,744 |
| t1_WOMAC-SCORE | 18,51 | 37 | 18,188 | 2,990 |

| **Korrelationen bei gepaarten Stichproben** | | | | |
| --- | --- | --- | --- | --- |
|  | | N | Korrelation | Signifikanz |
| Paaren 1 | t0_WOMAC-SCORE & t1_WOMAC-SCORE | 37 | ,652 | ,000 |

- Nebenaspekt: Werte sind korreliert, dh je höher vorher, desto höher auch nachher

| **Test bei gepaarten Stichproben** | | | | | | | | | |
| --- | --- | --- | --- | --- | --- | --- | --- | --- | --- |
|  | | Gepaarte Differenzen | | | | | T | df | Sig. (2-seitig) |
| Mittelwert | Standardabweichung | Standardfehler des Mittelwertes | 95% Konfidenzintervall der Differenz | |
| Untere | Obere |
| Paaren 1 | t0_WOMAC-SCORE - t1_WOMAC-SCORE | 21,216 | 17,575 | 2,889 | 15,356 | 27,076 | 7,343 | 36 | ,000 |

- Signifikanter Unterschied zwischen Vorher und Nachher, Wert wird geringer (Mittelwert von 39,7 auf 18,5)

**Allgemeines Lineares Modell: Nochmals dieser Vergleich nun inklusive Geschlecht**

| **Innersubjektfaktoren** | |
| --- | --- |
| Maß: MASS_1 | |
| Faktor1 | Abhängige Variable |
| 1 | t0_WOMACSCORE |
| 2 | t1_WOMACSCORE |

| **Deskriptive Statistiken** | | | | |
| --- | --- | --- | --- | --- |
|  | t1_Geschlecht | Mittelwert | Standardabweichung | N |
| t0_WOMAC-SCORE | 0 | 45,43 | 30,160 | 14 |
| 1 | 36,26 | 16,668 | 23 |
| Gesamt | 39,73 | 22,773 | 37 |
| t1_WOMAC-SCORE | 0 | 17,57 | 16,379 | 14 |
| 1 | 19,09 | 19,542 | 23 |
| Gesamt | 18,51 | 18,188 | 37 |

| **Tests der Innersubjektkontraste** | | | | | | |
| --- | --- | --- | --- | --- | --- | --- |
| Maß: MASS_1 | | | | | | |
| Quelle | Faktor1 | Quadratsumme vom Typ III | df | Mittel der Quadrate | F | Sig. |
| Faktor1 | Linear | 8823,653 | 1 | 8823,653 | 60,991 | ,000 |
| Faktor1 * t1_Geschlecht | Linear | 496,626 | 1 | 496,626 | 3,433 | ,072 |
| Fehler(Faktor1) | Linear | 5063,509 | 35 | 144,672 |  |  |

- Signifikanter Vorher-Nachher-Unterschied (über Geschlechter hinweg)
- Tendenzielle Wechselwirkung zwischen Zeitverlauf und Geschlecht:

Vorher und nachher unterscheiden sich die Geschlechter nicht von einander

Ergebnis = stabil:

| **Tests der Zwischensubjekteffekte** | | | | | |
| --- | --- | --- | --- | --- | --- |
| Maß: MASS_1  Transformierte Variable: Mittel | | | | | |
| Quelle | Quadratsumme vom Typ III | df | Mittel der Quadrate | F | Sig. |
| Konstanter Term | 60945,932 | 1 | 60945,932 | 86,139 | ,000 |
| t1_Geschlecht | 254,797 | 1 | 254,797 | ,360 | ,552 |
| Fehler | 24763,609 | 35 | 707,532 |  |  |

- Kein Geschlechtsunterschied (über Zeitpunkte hinweg)

Days postoperatively was analyzed as covariate analyses and did not alter results.

**Geschätzte Randmittel: Details zur Wechselwirkung**

**1. t1_Geschlecht * Faktor1**

| **Paarweise Vergleiche** | | | | | | | |
| --- | --- | --- | --- | --- | --- | --- | --- |
| Maß: MASS_1 | | | | | | | |
| Faktor1 | (I)t1_Geschlecht | (J)t1_Geschlecht | Mittlere Differenz (I-J) | Standardfehler | Sig. | 95% Konfidenzintervall für die Differenz | |
| Untergrenze | Obergrenze |
| 1 | 0 | 1 | 9,168 | 7,674 | ,240 | -6,411 | 24,747 |
| 1 | 0 | -9,168 | 7,674 | ,240 | -24,747 | 6,411 |
| 2 | 0 | 1 | -1,516 | 6,248 | ,810 | -14,199 | 11,168 |
| 1 | 0 | 1,516 | 6,248 | ,810 | -11,168 | 14,199 |

- Geschlechtsvergleich getrennt nach Zeitpunkt: Sowohl vorher als auch nachher kein Unterschied

**2. t1_Geschlecht * Faktor1**

| **Paarweise Vergleiche** | | | | | | | |
| --- | --- | --- | --- | --- | --- | --- | --- |
| Maß: MASS_1 | | | | | | | |
| t1_Geschlecht | (I)Faktor1 | (J)Faktor1 | Mittlere Differenz (I-J) | Standardfehler | Sig. | 95% Konfidenzintervall für die Differenz | |
| Untergrenze | Obergrenze |
| 0 | 1 | 2 | 27,857 | 4,546 | ,000 | 18,628 | 37,086 |
| 2 | 1 | -27,857 | 4,546 | ,000 | -37,086 | -18,628 |
| 1 | 1 | 2 | 17,174 | 3,547 | ,000 | 9,973 | 24,374 |
| 2 | 1 | -17,174 | 3,547 | ,000 | -24,374 | -9,973 |

- Zeitverlaufsvergleich getrennt nach Geschlecht: In beiden Geschlechtern gibt es Vorher-Nachher-Unterschied
- Die Wechselwirkung ist in beide Blickrichtungen nicht interessant und weil nicht signifikant, auch nicht berichtenswert

**Allgemeines Lineares Modell: Nun mit Kovariate TagepostOp**

| **Innersubjektfaktoren** | |
| --- | --- |
| Maß: MASS_1 | |
| Faktor1 | Abhängige Variable |
| 1 | t0_WOMACSCORE |
| 2 | t1_WOMACSCORE |

| **Deskriptive Statistiken** | | | | |
| --- | --- | --- | --- | --- |
|  | t1_Geschlecht | Mittelwert | Standardabweichung | N |
| t0_WOMAC-SCORE | 0 | 45,43 | 30,160 | 14 |
| 1 | 36,26 | 16,668 | 23 |
| Gesamt | 39,73 | 22,773 | 37 |
| t1_WOMAC-SCORE | 0 | 17,57 | 16,379 | 14 |
| 1 | 19,09 | 19,542 | 23 |
| Gesamt | 18,51 | 18,188 | 37 |

| **Tests der Innersubjektkontraste** | | | | | | |
| --- | --- | --- | --- | --- | --- | --- |
| Maß: MASS_1 | | | | | | |
| Quelle | Faktor1 | Quadratsumme vom Typ III | df | Mittel der Quadrate | F | Sig. |
| Faktor1 | Linear | 2997,921 | 1 | 2997,921 | 20,333 | ,000 |
| Faktor1 * t1_Tagepostop | Linear | 50,608 | 1 | 50,608 | ,343 | ,562 |
| Faktor1 * t1_Geschlecht | Linear | 500,671 | 1 | 500,671 | 3,396 | ,074 |
| Fehler(Faktor1) | Linear | 5012,901 | 34 | 147,438 |  |  |

| **Tests der Zwischensubjekteffekte** | | | | | |
| --- | --- | --- | --- | --- | --- |
| Maß: MASS_1  Transformierte Variable: Mittel | | | | | |
| Quelle | Quadratsumme vom Typ III | df | Mittel der Quadrate | F | Sig. |
| Konstanter Term | 33490,984 | 1 | 33490,984 | 55,239 | ,000 |
| t1_Tagepostop | 4149,688 | 1 | 4149,688 | 6,844 | ,013 |
| t1_Geschlecht | 282,178 | 1 | 282,178 | ,465 | ,500 |
| Fehler | 20613,921 | 34 | 606,292 |  |  |

- Ergebnis wie oben plus signifikante Bedeutung der Kovariate TagepostOP

**Geschätzte Randmittel**

**1. t1_Geschlecht * Faktor1**

| **Paarweise Vergleiche** | | | | | | | |
| --- | --- | --- | --- | --- | --- | --- | --- |
| Maß: MASS_1 | | | | | | | |
| Faktor1 | (I)t1_Geschlecht | (J)t1_Geschlecht | Mittlere Differenz (I-J) | Standardfehler | Sig. | 95% Konfidenzintervall für die Differenz | |
| Untergrenze | Obergrenze |
| 1 | 0 | 1 | 9,391 | 7,210 | ,202 | -5,262 | 24,043 |
| 1 | 0 | -9,391 | 7,210 | ,202 | -24,043 | 5,262 |
| 2 | 0 | 1 | -1,337 | 5,885 | ,822 | -13,298 | 10,624 |
| 1 | 0 | 1,337 | 5,885 | ,822 | -10,624 | 13,298 |

**2. t1_Geschlecht * Faktor1**

| **Paarweise Vergleiche** | | | | | | | |
| --- | --- | --- | --- | --- | --- | --- | --- |
| Maß: MASS_1 | | | | | | | |
| t1_Geschlecht | (I)Faktor1 | (J)Faktor1 | Mittlere Differenz (I-J) | Standardfehler | Sig. | 95% Konfidenzintervall für die Differenz | |
| Untergrenze | Obergrenze |
| 0 | 1 | 2 | 27,885 | 4,590 | ,000 | 18,557 | 37,212 |
| 2 | 1 | -27,885 | 4,590 | ,000 | -37,212 | -18,557 |
| 1 | 1 | 2 | 17,157 | 3,581 | ,000 | 9,880 | 24,434 |
| 2 | 1 | -17,157 | 3,581 | ,000 | -24,434 | -9,880 |

- Auch wie oben

**Allgemeines Lineares Modell: Und nun auch mit zusätzlicher Kovariate Alter**

*Gibt’s einen Zeit- und Geschlechtsunterschied in Abhänägigkeit vom Alter als Kontrollvariable: Wenn alle gleich alt wären, hätten wir keinen Vorher / nachher unterschied.?!?! Das ist unplausibel / unerklärbar...Alter korreliert auch nicht mit der Differenz...zufällig....WEGLASSEN!*

| **Innersubjektfaktoren** | |
| --- | --- |
| Maß: MASS_1 | |
| Faktor1 | Abhängige Variable |
| 1 | t0_WOMACSCORE |
| 2 | t1_WOMACSCORE |

| **Deskriptive Statistiken** | | | | |
| --- | --- | --- | --- | --- |
|  | t1_Geschlecht | Mittelwert | Standardabweichung | N |
| t0_WOMAC-SCORE | 0 | 45,43 | 30,160 | 14 |
| 1 | 36,26 | 16,668 | 23 |
| Gesamt | 39,73 | 22,773 | 37 |
| t1_WOMAC-SCORE | 0 | 17,57 | 16,379 | 14 |
| 1 | 19,09 | 19,542 | 23 |
| Gesamt | 18,51 | 18,188 | 37 |

| **Tests der Innersubjektkontraste** | | | | | | |
| --- | --- | --- | --- | --- | --- | --- |
| Maß: MASS_1 | | | | | | |
| Quelle | Faktor1 | Quadratsumme vom Typ III | df | Mittel der Quadrate | F | Sig. |
| Faktor1 | Linear | 264,542 | 1 | 264,542 | 1,762 | ,194 |
| Faktor1 * t1_Tagepostop | Linear | 30,629 | 1 | 30,629 | ,204 | ,654 |
| Faktor1 * t1_Alter | Linear | 57,231 | 1 | 57,231 | ,381 | ,541 |
| Faktor1 * t1_Geschlecht | Linear | 455,028 | 1 | 455,028 | 3,030 | ,091 |
| Fehler(Faktor1) | Linear | 4955,670 | 33 | 150,172 |  |  |

| **Tests der Zwischensubjekteffekte** | | | | | |
| --- | --- | --- | --- | --- | --- |
| Maß: MASS_1  Transformierte Variable: Mittel | | | | | |
| Quelle | Quadratsumme vom Typ III | df | Mittel der Quadrate | F | Sig. |
| Konstanter Term | 898,488 | 1 | 898,488 | 1,657 | ,207 |
| t1_Tagepostop | 2834,215 | 1 | 2834,215 | 5,228 | ,029 |
| t1_Alter | 2723,808 | 1 | 2723,808 | 5,024 | ,032 |
| t1_Geschlecht | 111,248 | 1 | 111,248 | ,205 | ,654 |
| Fehler | 17890,113 | 33 | 542,125 |  |  |

- Hier plötzlich kein Vorher-Nachher-Unterschied mehr, nur mehr signifikante Bedeutung der beiden Kovariaten TagepostOP und Alter…

**Geschätzte Randmittel**

**1. t1_Geschlecht * Faktor1**

| **Paarweise Vergleiche** | | | | | | | |
| --- | --- | --- | --- | --- | --- | --- | --- |
| Maß: MASS_1 | | | | | | | |
| Faktor1 | (I)t1_Geschlecht | (J)t1_Geschlecht | Mittlere Differenz (I-J) | Standardfehler | Sig. | 95% Konfidenzintervall für die Differenz | |
| Untergrenze | Obergrenze |
| 1 | 0 | 1 | 7,695 | 6,929 | ,275 | -6,401 | 21,792 |
| 1 | 0 | -7,695 | 6,929 | ,275 | -21,792 | 6,401 |
| 2 | 0 | 1 | -2,603 | 5,716 | ,652 | -14,232 | 9,026 |
| 1 | 0 | 2,603 | 5,716 | ,652 | -9,026 | 14,232 |

**2. t1_Geschlecht * Faktor1**

| **Paarweise Vergleiche** | | | | | | | |
| --- | --- | --- | --- | --- | --- | --- | --- |
| Maß: MASS_1 | | | | | | | |
| t1_Geschlecht | (I)Faktor1 | (J)Faktor1 | Mittlere Differenz (I-J) | Standardfehler | Sig. | 95% Konfidenzintervall für die Differenz | |
| Untergrenze | Obergrenze |
| 0 | 1 | 2 | 27,618 | 4,652 | ,000 | 18,153 | 37,083 |
| 2 | 1 | -27,618 | 4,652 | ,000 | -37,083 | -18,153 |
| 1 | 1 | 2 | 17,320 | 3,623 | ,000 | 9,948 | 24,691 |
| 2 | 1 | -17,320 | 3,623 | ,000 | -24,691 | -9,948 |

- Auch in anderen Variante von Kovariaten so: Sobald Alter dabei, verschwindet vorher-nachher-Unterschied.
- Anhand der Mittelwerte nicht plausibel für mich. Daher wohl auch eher nicht interpretierbar.
- Ich würde das letzte weglassen und nur ev. die Analyse mit TagepostOP berichten, weil das interessant sein könnte, da ja die letzten Nachher-Werte verwendet wurden und diese aber von unterschiedlichen Zeitpunkten sind und diese Kovariate das ausgleicht, dass eben manche 1 Jahr und manche 4 Jahre dazwischen hatten…

Ergänzend dazu: Die Differenz Vorher-Nachher ist mit Alter nicht korreliert (r=,151; p=,373), also daraus keine Notwendigkeit Alter als Kovariate zu berücksichtigen…
